# Supplementary material for: Emergence of Burkholderia pseudomallei Sequence Type 562, Northern Australia
Source: PubMed Central journal article supplement (PMC8007296; doi:10.3201/eid2704.202716), 2021-04
Supplement: 20-2716-Techapp-s2.pdf [file 20-2716-Techapp-s2.pdf]

# Emergence of *Burkholderia pseudomallei* Sequence Type 562, Northern Australia

## Appendix 2

### Methods

#### Statistical Analyses

We used a bivariate analysis to show that 2 areas of Darwin, ethnicity, and history of hazardous alcohol consumption were associated with ST562 infection ( $p < 0.05$ ). We included these characteristics, along with year of diagnosis, in a binomial multivariable generalized linear model with ST562 infection as the outcome. We observed no evidence of collinearity. Using bootstrapped refitted residuals with the R package DHARMA (The R Project, <https://cran.r-project.org>), we found no evidence of overdispersion, outliers, or excessively influential observations. We tested a random intercept for the urban Darwin area in a multivariable generalized linear mixed model using the R package lme2 but did not improve the model fit and was not pursued further.

#### Bioinformatic Analyses

We used Snippy version 4.3.6 (<https://github.com/tseemann/snippy>) with thresholds for calling variants that included  $\geq 10\times$  coverage and  $\geq 90\%$  variant prevalence. We used IQ-TREE version 1.6.10 (1) to conduct a maximum-likelihood regression analysis using a generalized time-reversible model with 4 gamma categories; 1,000 ultrafast bootstrap approximation replicates; and 1,000 bootstrap approximate likelihood-ratio test replicates. We visualized and annotated trees using the R package ggtree (2).

We conducted temporal analysis on the core Australian ST562 alignment using BEAST 2 (3). We compared combinations of nucleotide substitution and clock models using nested sampling and calculation of Bayes factor. We selected a generalized time-reversible site model with 4 gamma categories, a relaxed clock with log-normal distribution of rates and a coalescent constant population model. We added constant sites to the .xml file using `beast2_constsites`

([https://github.com/andersgs/beast2\\_constsites](https://github.com/andersgs/beast2_constsites)). We undertook 10 replicates of the analysis, each with 800 million iterations. We sampled from the posterior every 80,000 iterations after an initial pre-burn-in of 8 million iterations. We combined logs using LogCombiner, with 15% burn-in, and resampled every 800,000th iteration. Effective sample sizes for all parameters were >200. We combined and resampled trees for a total of 8,500 trees, then used TreeAnnotator to calculate a maximum clade credibility tree. To test whether priors were driving results, we ran 10 analysis replicates with random tip dates with .xml files generated with the R package TipDatingBeast, and a replicate sampling from the prior with no sequence data; none of these analyses converged.

## References

1. Nguyen LT, Schmidt HA, von Haeseler A, Minh BQ. IQ-TREE: a fast and effective stochastic algorithm for estimating maximum-likelihood phylogenies. *Mol Biol Evol.* 2015;32:268–74. PubMed <https://doi.org/10.1093/molbev/msu300>
2. Yu G, Lam TT, Zhu H, Guan Y. Two methods for mapping and visualizing associated data on phylogeny using ggtree. *Mol Biol Evol.* 2018;35:3041–3. PubMed <https://doi.org/10.1093/molbev/msy194>
3. Bouckaert R, Heled J, Kühnert D, Vaughan T, Wu CH, Xie D, et al. BEAST 2: a software platform for Bayesian evolutionary analysis. *PLOS Comput Biol.* 2014;10:e1003537. PubMed <https://doi.org/10.1371/journal.pcbi.1003537>
